# Supplementary material for: HLA-DRA-Mediated Inhibition of T-Cell Proliferation by Differentiated Airway Epithelium and Its Disruption in Smoking- Associated Airway Inflammation
Source: Research Square preprint supplement (doi:10.21203/rs.3.rs-6898981/v1), 2025-07-24
Supplement: Supplementary file 1 [file c08c2924e030af681b530a9c.docx]

**Supplementary Materials**

**1.Supplimentary Methods**

**1.1 Isolation, culture, and identification of primary human airway epithelial cells**

Under a protocol approved by the Biomedical Research Ethics Committee of West China Hospital of Sichuan University, nonsmoking volunteers were recruited for this study. The subjects had bronchofibroscopy for benign diseases They had bronchofibroscopy for benign diseases. Isolation, culture, and identification of primary human airway epithelial cells (HAECs) were performed as previously described[1-2], with some modifications. The detailed operation was as follows. Following written informed consent, two disposable bronchoscopic brushes with a diameter of 2 mm were used to gently brush the airway epithelium at about 10 different sites in the grade 2-3 bronchial lumen of the left and lower lobes of the right lung, slide each area back and forth 5 to 10 times, and then flick the cells from the brush into a pre-chilled epithelial basal cell culture medium (BEBM medium) for purification of airway basal cells (BC) . total airway epithelium were then cultured in T-75 flasks with the airway basal cell culture medium (BEGM medium). The next day, the non-adherent cells were removed by changing the culture medium (only basal cells grew adherently, the inflammatory cells and other cellular components of the airway epithelium such as ciliated cells and club cells were removed during fluid exchange because they could not be adherent); Replace the BEGM medium every 2 days thereafter. At day 7 to 8 of culture, when the cells were 70-80% confluent, the cells were removed from the flasks using trypsin-ethylenediaminetetraacetic acid (EDTA). The BC phenotype was confirmed by positive staining for BC marker keratin 5 (>98% positive cells) and negative staining for lineage-specific markers including tubulin beta 4 (ciliated), MUC5AC (mucus-producing), chromogranin A (neuroendocrine) and N-cadherin (mesenchymal).

**1.2 Cigarette smoke extract**

Cigarette smoke extract (CSE) was made from one brand of cigarette (Marboro brand) bubbled throug 20 ml of air liquid interface (ALI) culture medium. To ensure standardization between experiments and batches of CSE, the absorbance was measured at 320 nm on a spectrophotometer and the optical density of 1 was defined as 100%. CSE was frozen in single use aliquots at -20ºC，and freshly prepared for cell treatment by being diluted in ALI culture medium. Both cells viability and the cytotoxic effect of CSE was measured following cell treatment using the cytotoxicity Detection Kit (Roche, Basel, Switzerland) according to the protocol provided by the manufacturer.Based on the results of cytotoxicity assessments, ALI differentiation medium containing 3% CSE concentration was used for the subsequent experiments.

**1.3 Immunohistochemical staining**

After dewaxing, the sections of paraformaldehyde-fixed, paraffin-embedded human airway epithelia were subjected to antigen repaired with citrate buffer ( #AP-9003-500;Thermo Fisher sciemtific; Waltham, MA, USA), followed by three 5-min washes in 1x PBST.  Subsequently, sections were immersed in  3% H2O2 (#216763; Sigma-Aldrich; St. Louis, MO, USA) for 30 min to *inactivate endogenous* peroxidases, then blocked in 5% goat serum (#G9023-10ML; Sigma-Aldrich; St. Louis, MO, USA) for 30 min. Next, diluted primary antibodies were applied and incubated overnight at 4°C. **After three 5-min PBST washes,** solutions were incubated with diluted secondary antibody at 37°C for 30 min. Unbound secondary antibodies were removed with three 5-min PBST washes. **Thereafter,** sections were stained for 30 min in the dark using the ABC high-HRP immunostainting kit (#PK-6101; Vector Laboratories, USA). **Following a final wash,** sections were counterstained with hematoxylin (#S216-32OZ; Poly scientific, Bay Shore, NY,USA.) for 1 min. **Finally,** sections were dehydrated, cleared, and mounted. Staining results were assessed by two independent pathologists using a Nikon Microphot microscope.

**1.4 Immunofluorescence staining**

HAECs in Transwells were fixed with 4% paraformaldehyde (#15710; Electron Microscopy Science; Hatfield, PA, USA) for 20 min. After  three 5-min washes in 1x PBST, cells were permeabilized with 0.2% Triton X-100 (# 93443; Fluka, Ronkonkoma, NY, USA) ) for 20 min at room temperature. Cells were then blocked with 5% goat serum(#G9023-10ML; Sigma-Aldrich; St. Louis, MO, USA) for 1 h at room temperature to avoid nonspecific binding of antibodies. Subsequently, cells were incubated with primary antibodies at 4°C overnight. The next day, cells incubated with the corresponding secondary antibodies for 1 h at room temperature in the dark **after three 5-min PBST washes. **Finally,**** cells underwent three additional 2-min PBST washes and were counterstained with 4′,6-diamidino-2-phenylindole (DAPI) (#S36937; Invitrogen; Carlsbad, CA, USA) to visualize nuclei. After dewaxing, *antigen* *repair,and blocking* mentioned above *,*sections of human airway epithelia were incubated with antibodies. And the subsequent steps are the same as those for HAECs. Stained samples were imaged using a Zeiss microscope (Zeiss; Jena, Germany).

**1.5 Western Blot**

Initially, HAECs in Transwells were lysed using 1x RIPA buffer (#R0278-50ML; Sigma-Aldrich; St. Louis, MO, USA) supplemented with protease and phosphatase inhibitors (#MJ163572; Thermo Scientific; Waltham, MA, USA) for total protein extraction.  Subsequently, protein concentrations were quantified using the BCA Assay Kit (#23227; Thermo Scientific; Waltham, MA, USA). Following quantification, samples (20μg proteins) were prepared for electrophoresis by adding NuPAGE ® 4X LDS Sample Buffer (#NP0007; Invitrogen; Carlsbad, CA, USA) and NuPAGE ® Sample Reducing Agent (10X) (#NP0009; Invitrogen; Carlsbad, CA, USA). These samples were then separated by sodium dodecyl sulfate polyacrylamide gel electrophoresis (SDS-PAGE) (#NP0001; Invitrogen; Carlsbad, CA, USA) and subsequently transferred to sodium dodecyl sulfate polyacrylamide gel electrophoresis (SDS-PAGE) membranes (Invitrogen; Carlsbad, CA, USA). Next, PVDF membranes were blocked for 1 h at RT in 5% skim milk (#170-6404; Bio-Rad; Hercules, CA, USA) and incubated with the diluted primary antibodies overnight at 4 ℃. After three 5-min washes with 1× PBST, PVDF membranes were incubated with diluted secondary antibodies for 1 h at room temperature. Following three additional washes, the chemiluminescence was carried out by using ECL Reagent (#RPN2232; Cytiva; Marlborough, MA, USA) and signals were captured with an X-Ray Film Processor (Kodak; Rochester, NY, USA). The primary and secondary antibodies involved in this experiment were provided in **Table S1**.

**1.6 TaqMan real-time PCR assay**

**Briefly,** total RNA of HAECs was extracted using an RNeasy MinElute Cleanup kit (#74204;(Qiagen, Hilden, Germany) following the manufacturer instructions. **Subsequently,** RNA concentration and purity were verified spectrophotometrically (NanoDrop ND-1000; Thermo Scientific; Wilmington, DE, USA), with all samples exhibiting A260/A280 ratios >1.9. **Next,** 1 μg total RNA was reverse-transcribed into cDNA using TaqMan Reverse Transcriptase Reaction kit (# N8080234;Life Technologies; Carlsbad, CA, USA) per manufacturer's protocol and stored at −20°C until genotype analysis. Then, TaqMan real-time PCR assay was performed using the ABI 7000 sequence Detection System (Applied Biosystems) as previously reported[3]Specific TaqMan probeswere purchased from Life Technologies to detect the human HLA-DRA and CYP1A1 gene (Assay ID: Hs00219575_m1, Hs00153120_m1). 18S (Assay ID: Hs99999901_s1) was used as a housekeeping gene for data normalization. 25ul Reactions were run in triplicate under standardized cycling conditions: 50°C for 2 min, 95°C for 10 min, **followed by** 40 cycles of 95°C for 15 sec and 60°C for 1 min. Gene expression was calculated via the 2 ΔΔCt method with 18S rRNA normalization.

## 1.7 Analysis of Single-Cell Sequencing Data

The “Seurat” R package [4] was used to analyze the single-cell sequencing data. The analysis mainly included the following steps: constructing objects, data standardization, data dimensionality reduction clustering, identifying marker genes and group differences comparison.First, a Seurat object was constructed using the CreateSeuratObject. The genes and cells were filtered for the first time as the minimum number of features was set at 200 and the minimum number of cells at 3. To filter cells once more, the following threshold was set:the number of features was between 200 and 6000, the proportion of mitochondrial genes was less than 35%,and the percentage of red blood cell reads was less than 20%. **Secondly,** the top 2000 hypervariable genes were selected as inputs for principal component analysis (PCA). The first 16 principal components (PCs) were identified as important principal components mainly via ElbowPlot for subsequent analysis. ****As data**** were ****originated from**** various datasets****,**** batch correction which may interfere downstream analysis was removed using the “harmony” R package [5]. Thirdly, the dimension of the data obtained after PCA was further reduced using UMAP. Before that, airway epithelial cell subgroups were identified using the FindClusters approach with a resolution of 0.5 after debugging and consulting the clustering results in the original contribution. Approximation and Projection (UMAP) is a dimension reduction popular learning technology based on the theoretical framework of Riemannian geometric generation data[6]. When working with high-throughput, high-dimensional data, like single-cell sequencing, UMAP runs better and is more scalable while maintaining more global structure.Fourthly, the cell types were divided into low-dimensional spaces and visualized using the DimPlot function. The expression and distribution of landscape and distinctive genes of airway epithelial cells were visualized using the FeaturePlot, DotPlot, DoHeatmap, and VlnPlot tools. Using well-established marker genes of different cell types that were collected from the literature and marker gene websites [7-10] (**Table S2**), we manually assigned a cell type to each cluster. Then, to assess the presence and relative abundance of HLA-DRA across identified cell types, feature plots, and volinplot were generated. Finally, the expression levels of HLA-DRA gene in individual cells across different airway epithelial cell types between the two groups (smoker vs. non-smoker) were extracted, and compared using the t-test or non-parametric Wilcoxon rank-sum test. The results were plotted as histograms.

**Reference**

1. Hiemstra PS, Epithelial antimicrobial peptides and proteins: their role in host defence and inflammation. Paediatr Respir Rev, 2001. 2(4): 306-10.
2. Gianotti A, Delpiano L, Caci E. In vitro Methods for the Development and Analysis of Human Primary Airway Epithelia. Front. Pharmacol. 2018;9:1176.
3. Kimura H, Kamiyama K, Imamoto T. Fenofibrate reduces cisplatin-induced apoptosis by inhibiting the p53/Puma/Caspase-9 pathway and the MAPK/Caspase-8 pathway rather than by promoting autophagy in murine renal proximal tubular cells. Biochem Biophys Rep. 2022;30:101237.
4. Hao Y, Hao S, Andersen-Nissen E. Integrated analysis of multimodal single-cell data. Cell . 2021;184(13):3573–3587.e29.
5. Korsunsky I. Millard N. Fan J. Fast, sensitive and accurate integration of single-cell data with harmony. Nature Methods . 2019;16(12):1289–1296.
6. Becht E, McInnes L, Healy J, et al. Dimensionality reduction for visualizing single-cell data using UMAP[J]. Nat Biotechnol, 2018.
7. Clarke Z A, Andrews T S, Atif J. Tutorial: guidelines for annotating single-cell transcriptomic maps using automated and manual methods[J]. Nat Protoc, 2021, 16(6): 2749-2764.
8. Zhang X, Lan Y, Xu J. CellMarker: a manually curated resource of cell markers in human and mouse[J]. Nucleic Acids Res, 2019, 47(D1): D721-D728.
9. Meng F L, Huang X L, Qin W Y. singleCellBase: a high-quality manually curated database of cell markers for single cell annotation across multiple species[J]. Biomark Res, 2023, 11(1): 83.
10. Cao Z J, Wei L, Lu S, et al. Searching large-scale scRNA-seq databases via unbiased cell embedding with Cell BLAST[J]. Nat Commun, 2020, 11(1): 3458.

2. **Supplimentary Tables**

**Table S1. The antibody information.**

| **Cluster** | **Marker gene** |
| --- | --- |
| Basal cell | KRT5、KRT15、KRT17、TP63、NGFR |
| Intermediate cell | KRT5、KRT15、TP63、SCGB1A1、PCNA |
| Club cell | SCGB1A1、CYP2F1、SCGB3A1、SCGB3A2、BPIFB1 |
| Goblet cell | MUC5AC、MUC5B |
| Ciliated cell | FOXJ1、DNAI1、DNAH12、FOXJ1 |
| Ionocyte | FOXI1、TMSB4X、STAP1 |
| Neuroendocrine cell | CHGA |
| NCLhigh cell | NCL |
| Mast cell | KIT |
| Antigen-presenting cell | HLA-DRA、HLA-DRB1、HLA-DPA1、HLA-DQA1 |
| T cell | CD3D、CD68 |

**Table S2. Marker gene of different cell types**

| **Protein name** | **Company** | **Catalog number** | **Working Concentration1** | | | |
| --- | --- | --- | --- | --- | --- | --- |
| **IHC2** | **IF3** | **Western4** | **Flow 5** |
| POU2AF1 | Santa Cruz Biotechnology | sc-955 | 1/800 | 1/50 | N/A | N/A |
| TP63 | Santa Cruz Biotechnology | sc-8431 | 1/200 | N/A | N/A | N/A |
| DNAI1 | Sigma-Aldrich | HPA021649 | N/A | N/A | 1: 2000 | N/A |
| SCGB1A1 | BioVendor | RD181022220 | N/A | 1/200 | 1: 2000 | N/A |
| CC10 | BioVendor |  |  |  |  | N/A |
| KRT5 | Thermo Scientific | PA1-37974 | N/A | N/A | 1: 2000 | N/A |
| HLA-DR | Santa Cruz Biotechnology | sc-53319 | N/A | N/A | 1: 1000 | N/A |
| GFP | OriGene Technologies | TA150041 | N/A | N/A | 1: 5000 | N/A |
| β-Actin | Sigma-Aldrich | A2228 | N/A | N/A | 1: 10000 | N/A |
| CD3 | Elabscience | E-AB-F1001C | N/A | N/A | N/A | 5ul/106 cells |
| Alexa Fluor®488- /555- labeled goat anti-mouse/ anti-rabbit IgG secondary antibody | Life technologies | - | N/A | 1:500 | N/A | N/A |
| IgG-HRP Goat anti-mouse/anti-  rabbit IgG | Santa cruz biotechnology | - | N/A | N/A | 1: 10000 | N/A |

1. **full uncropped Gels and Blots image(s)**

Fig1.G

POU2AF1 DNAI1 and CC10







HLA-DRA KRT5


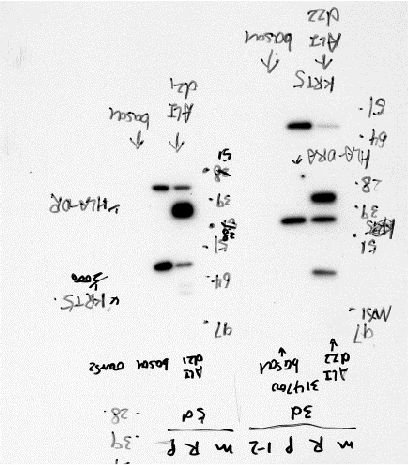




β-actin





Fig4.E

HLA-DRA β-actin
